# Supplementary material for: Applying openEHR’s Guideline Definition Language to the SITS international stroke treatment registry: a European retrospective observational study
Source: BMC Med Inform Decis Mak. 2017 Jan 10;17:7. doi: 10.1186/s12911-016-0401-5 (PMC5223429; doi:10.1186/s12911-016-0401-5)
Supplement: Additional file 2: — Previous Strokes and Diabetes – contains data on previous stroke and diabetes diagnoses among the 12,046 patients of the 2010–2011 study period. (CSV 426 kb) [file 12911_2016_401_MOESM2_ESM.csv]

ehrId	previous_stroke_within_last_three_months	previous_stroke_earlier_than_three_months_ago	diabetes	previous_stroke_and_diabetes_mellitus
patient1	false	false	false	false
patient2	false	false	false	false
patient3	false	false	false	false
patient4		true	false	false
patient5	false	false	false	false
patient6	false	false	true	false
patient7	false	false	true	false
patient8	false	false	false	false
patient9	false	false	false	false
patient10	false	false	false	false
patient11	false	false	false	false
patient12	false	false	false	false
patient13	false	false	false	false
patient14	false	false	false	false
patient15	false	false	false	false
patient16	false	false	false	false
patient17	false	false	false	false
patient18		true	true	true
patient19	false	false	true	false
patient20	false	false	false	false
patient21	false	true	true	true
patient22	false	false	true	false
patient23	false	false	false	false
patient24	false	false	false	false
patient25	false	false	true	false
patient26	false	true	true	true
patient27	false	false	true	false
patient28	false	false	false	false
patient29	false	false	false	false
patient30	false	false	false	false
patient31	false	false	false	false
patient32	false	false	true	false
patient33	false	false	false	false
patient34	false	false	true	false
patient35	false	false	true	false
patient36	false	false	false	false
patient37	false	false	false	false
patient38	false	false	true	false
patient39	false	false	false	false
patient40	false	false	false	false
patient41	false	false	true	false
patient42		true	true	true
patient43		true	false	false
patient44	false	false	false	false
patient45		true	false	false
patient46	false	false	false	false
patient47	false	false	false	false
patient48	false	false	false	false
patient49	false	false	true	false
patient50	false	false	false	false
patient51	false	false	false	false
patient52	false	false	false	false
patient53	false	false	true	false
patient54	false	false	true	false
patient55	false	false	false	false
patient56	false	false	false	false
patient57		true	true	true
patient58	false	false	false	false
patient59	false	false	false	false
patient60	false	false	false	false
patient61	false	false	false	false
patient62		true	false	false
patient63	false	false	false	false
patient64	false	false	false	false
patient65	false	false	false	false
patient66	false	false	false	false
patient67	false	false	false	false
patient68	false	false	true	false
patient69	false	false	true	false
patient70	false	false	true	false
patient71	false	false	false	false
patient72	false	false	false	false
patient73	false	false	false	false
patient74	false	false	true	false
patient75	false	false	true	false
patient76	false	false	false	false
patient77	false	false	false	false
patient78	false	false	false	false
patient79	false	false	false	false
patient80	false	true	false	false
patient81	false	false	true	false
patient82	false	false	false	false
patient83	false	false	true	false
patient84	false	false	true	false
patient85	false	false	false	false
patient86	false	false	false	false
patient87	false	false	false	false
patient88	false	true	false	false
patient89	false	false	false	false
patient90	false	false	false	false
patient91	false	false	false	false
patient92	false	false	false	false
patient93	false	false	false	false
patient94	false	false	false	false
patient95	false	false	true	false
patient96	false	false	true	false
patient97	false	false	false	false
patient98	false	false	false	false
patient99	false	false	false	false
patient100	false	false	false	false
patient101	false	false	false	false
patient102	false	false	false	false
patient103	false	false	false	false
patient104	false	false	false	false
patient105	true	false	true	true
patient106	false	false	false	false
patient107	false	true	false	false
patient108	false	true	false	false
patient109	false	false	false	false
patient110	false	false	false	false
patient111	false	false	false	false
patient112	false	false	true	false
patient113		true	true	true
patient114	false	false	false	false
patient115	true		false	false
patient116	false	false	false	false
patient117	false	false	false	false
patient118	false	false	false	false
patient119		true	false	false
patient120	false	false	false	false
patient121		true	false	false
patient122	false	false	true	false
patient123	false	false	false	false
patient124	false	false	false	false
patient125	false	false	false	false
patient126	false	false	false	false
patient127	false	false	false	false
patient128	false	false	false	false
patient129	false	false	false	false
patient130	false	false	true	false
patient131	false	false	false	false
patient132	false	false	false	false
patient133	false	false	false	false
patient134	false	false	false	false
patient135	false	false	false	false
patient136	false	false	false	false
patient137	false	false	true	false
patient138	false	false	false	false
patient139	false	false	true	false
patient140	false	false	false	false
patient141			true
patient142		true	false	false
patient143	false	false	true	false
patient144	false	false	false	false
patient145	false	false	false	false
patient146	false	false	true	false
patient147	false	false	false	false
patient148	false	false	true	false
patient149	false	false	true	false
patient150	false	false	false	false
patient151	false	false	true	false
patient152	false	false	false	false
patient153	false	false	false	false
patient154	false	false	false	false
patient155	false	false	false	false
patient156	false	false	false	false
patient157	false	false	false	false
patient158	false	false	false	false
patient159	false	false	false	false
patient160	false	false	false	false
patient161	false	false	false	false
patient162	false	false	true	false
patient163	false	false	false	false
patient164	false	false	true	false
patient165	false	false	false	false
patient166	false	false	false	false
patient167	false	false	false	false
patient168	false	false	false	false
patient169	false	true	false	false
patient170	false	false	true	false
patient171	false	false	false	false
patient172	false	false	true	false
patient173	false	false	false	false
patient174	false	false	false	false
patient175	false	false	false	false
patient176	false	false	false	false
patient177	false	false	false	false
patient178	false	false	false	false
patient179	false	false	false	false
patient180	false	false	false	false
patient181	false	false	false	false
patient182	false	false	false	false
patient183	false	false	false	false
patient184	false	false	true	false
patient185	false	false	false	false
patient186	true	true	false	false
patient187	false	false	false	false
patient188	false	false	false	false
patient189	false	false	true	false
patient190	false	false	false	false
patient191	false	false	false	false
patient192	false	false	true	false
patient193	false	false	true	false
patient194	false	false	true	false
patient195	false	false	false	false
patient196	false	false	false	false
patient197	false	false	false	false
patient198	false	false	true	false
patient199	false	false	false	false
patient200	false	false	false	false
patient201	false	false	false	false
patient202	false	false	true	false
patient203	true	false	true	true
patient204	false	false	false	false
patient205	false	false	true	false
patient206	false	false	true	false
patient207	false	false	true	false
patient208	false	false	false	false
patient209	false	false	false	false
patient210	false	false	true	false
patient211	false	false	false	false
patient212	false	false	false	false
patient213	false	false	true	false
patient214	false	false	true	false
patient215	false	false	true	false
patient216	false	false	false	false
patient217	false	false	true	false
patient218	false	false	false	false
patient219	false	false	false	false
patient220	false	false	false	false
patient221	false	false	true	false
patient222	false	false	false	false
patient223	false	false	true	false
patient224	false	false	false	false
patient225	false	false	false	false
patient226	false	false	false	false
patient227	false	false	true	false
patient228	false	false	false	false
patient229	false	false	false	false
patient230	false	false	false	false
patient231	false	false	false	false
patient232	false	false	true	false
patient233	false	false	true	false
patient234	false	false	false	false
patient235	false	false	false	false
patient236	false	false	false	false
patient237	false	false	false	false
patient238	false	false	true	false
patient239	false	false	false	false
patient240	false	false	false	false
patient241	false	false	false	false
patient242	false	false	false	false
patient243	false	false	false	false
patient244	false	false	false	false
patient245	false	false	false	false
patient246	false	false	false	false
patient247	false	false	false	false
patient248	false	false	false	false
patient249	false	false	false	false
patient250	false	false	false	false
patient251	false	false	false	false
patient252	false	false	false	false
patient253	true	true	false	false
patient254	false	false	false	false
patient255	false	false	false	false
patient256	false	false	false	false
patient257	false	false	true	false
patient258	false	false	false	false
patient259	false	false	true	false
patient260	false	false	false	false
patient261	false	false	false	false
patient262	false	false	false	false
patient263	false	false	false	false
patient264	false	false	true	false
patient265	false	false	false	false
patient266	false	false	true	false
patient267	true	false	false	false
patient268	false	false	false	false
patient269	false	false	false	false
patient270	false	false	false	false
patient271	false	false	false	false
patient272	false	false	false	false
patient273	false	false	false	false
patient274	false	false	false	false
patient275	false	false	false	false
patient276	false	false	true	false
patient277	false	false	false	false
patient278	false	false	false	false
patient279	false	false	true	false
patient280	false	false	true	false
patient281	false	false	false	false
patient282	false	false	true	false
patient283	false	false	false	false
patient284	false	false	false	false
patient285	true	false	false	false
patient286	false	false	false	false
patient287	false	false	true	false
patient288	false	false	true	false
patient289	false	false	false	false
patient290	false	false	true	false
patient291	false	true	false	false
patient292	false	false	false	false
patient293	false	false	false	false
patient294	false	false	false	false
patient295	false	false	false	false
patient296	false	true	false	false
patient297	false	false	true	false
patient298	false	false	false	false
patient299	false	true	true	true
patient300	false	false	false	false
patient301	false	false	false	false
patient302	false	false	true	false
patient303	false	false	false	false
patient304	false	false	false	false
patient305	false	false	true	false
patient306	false	false	true	false
patient307	false	false	true	false
patient308	false	false	false	false
patient309	false	false	false	false
patient310	false	false	false	false
patient311	false	false	false	false
patient312	false	false	false	false
patient313	false	false	false	false
patient314	true		true	true
patient315	false	false	false	false
patient316	true		false	false
patient317	false	false	false	false
patient318	false	false	false	false
patient319	false	false	false	false
patient320	false	false	true	false
patient321	false	false	false	false
patient322	false	false	false	false
patient323	false	false	false	false
patient324	false	false	false	false
patient325	false	false	false	false
patient326	false	false	false	false
patient327	false	true	false	false
patient328	false	false	false	false
patient329	false	false	false	false
patient330	false	false	false	false
patient331	false	false	true	false
patient332	false	false	false	false
patient333	false	false	false	false
patient334	false	false	false	false
patient335	false	false	false	false
patient336	false	false	false	false
patient337	false	false	false	false
patient338	false	false	true	false
patient339	false	false	false	false
patient340	false	false	false	false
patient341	false	false	false	false
patient342	false	false	false	false
patient343	false	false	false	false
patient344	false	false	false	false
patient345	false	false	true	false
patient346	false	false	false	false
patient347	false	false	true	false
patient348	false	false	false	false
patient349	false	false	true	false
patient350	false	false	true	false
patient351	false	false	true	false
patient352	false	false	false	false
patient353		true	false	false
patient354	false	false	false	false
patient355	false	false	false	false
patient356	false	false	true	false
patient357	false	false	false	false
patient358	false	false	false	false
patient359		true	false	false
patient360	false	false	false	false
patient361	false	false	false	false
patient362	false	false	false	false
patient363	false	false	false	false
patient364	false	false	false	false
patient365	false	false	false	false
patient366	false	false	false	false
patient367	false	false	true	false
patient368	false	false	false	false
patient369	false	false	false	false
patient370	false	false	false	false
patient371	false	false	false	false
patient372	false	false	false	false
patient373	false	false	false	false
patient374	false	false	true	false
patient375	false	false	false	false
patient376	false	false	true	false
patient377	false	false	true	false
patient378	false	false	true	false
patient379	false	false	false	false
patient380	false	false	false	false
patient381		true	false	false
patient382	false	false	false	false
patient383	false	false	false	false
patient384	false	false	true	false
patient385	false	false	true	false
patient386		true	false	false
patient387		true	false	false
patient388		true	true	true
patient389		true	false	false
patient390		true	true	true
patient391		true	false	false
patient392		true	false	false
patient393	false	false	true	false
patient394	false	false	false	false
patient395	false	false	true	false
patient396	false	false	false	false
patient397	false	false	true	false
patient398	false	false	false	false
patient399	false	false	false	false
patient400	false	false	false	false
patient401	false	false	false	false
patient402	false	false	false	false
patient403	false	false	false	false
patient404	false	false	false	false
patient405	false	false	false	false
patient406	false	false	false	false
patient407	false	false	false	false
patient408	false	false	false	false
patient409	false	false	false	false
patient410	false	true	false	false
patient411	false	false	false	false
patient412	false	false	true	false
patient413	false	false	true	false
patient414	false	false	false	false
patient415	false	false	false	false
patient416	false	false	false	false
patient417	false	false	false	false
patient418	false	false	true	false
patient419	false	false	false	false
patient420	false	false	false	false
patient421	false	false	false	false
patient422	false	false	false	false
patient423	false	false	false	false
patient424	false	false	false	false
patient425	false	false	false	false
patient426	false	false	false	false
patient427	false	false	false	false
patient428		true	false	false
patient429	false	false	true	false
patient430	false	false	false	false
patient431		true	true	true
patient432	false	false	false	false
patient433	false	false	false	false
patient434	false	false	false	false
patient435	false	false	false	false
patient436	false	false	false	false
patient437	false	false	false	false
patient438			false	false
patient439	false	false	false	false
patient440	false	false	false	false
patient441	false	false	true	false
patient442	false	false	false	false
patient443	false	false	true	false
patient444	false	false	false	false
patient445			false	false
patient446	false	false	false	false
patient447	false	false	false	false
patient448	false	false	false	false
patient449		true	false	false
patient450	false	false	true	false
patient451	false	false	false	false
patient452	false	false	true	false
patient453	false	false	true	false
patient454	false	false	false	false
patient455	false	false	false	false
patient456	false	false	true	false
patient457	false	false	false	false
patient458	false	false	true	false
patient459	false	false	false	false
patient460	false	false	false	false
patient461	false	false	true	false
patient462	false	false	false	false
patient463	false	false	false	false
patient464	false	false	false	false
patient465	false	false	false	false
patient466	false	true	false	false
patient467	false	false	false	false
patient468	false	false	false	false
patient469	false	false	false	false
patient470	false	false	false	false
patient471	false	false	false	false
patient472	false	false	false	false
patient473	false	false	false	false
patient474	false	false	false	false
patient475	false	false	false	false
patient476	false	true	false	false
patient477	false	false	false	false
patient478	false	false	true	false
patient479	false	false	false	false
patient480	false	false	false	false
patient481	false	false	true	false
patient482	false	false	false	false
patient483	false	false	false	false
patient484	false	false	false	false
patient485	false	false	false	false
patient486	false	false	false	false
patient487	false	false	false	false
patient488	false	false	false	false
patient489	false	false	false	false
patient490	false	false	false	false
patient491	false	false	false	false
patient492	false	false	false	false
patient493	false	false	true	false
patient494	false	false	false	false
patient495		true	false	false
patient496	false	false	true	false
patient497	false	false	false	false
patient498	false	false	true	false
patient499	false	false	false	false
patient500	false	false	false	false
patient501			false	false
patient502	false	false	false	false
patient503	false	false	false	false
patient504	false	false	true	false
patient505	false	false	true	false
patient506
patient507	false	false	false	false
patient508			true
patient509	false	false	false	false
patient510	false	false	false	false
patient511	false	false	false	false
patient512	false	false	false	false
patient513	false	false	false	false
patient514		true	false	false
patient515	false	false	false	false
patient516	false	false	false	false
patient517		true	false	false
patient518	false	false	false	false
patient519	false	false	false	false
patient520	false	false	false	false
patient521	false	false	false	false
patient522		true	false	false
patient523	false	false	false	false
patient524	false	false	false	false
patient525	false	false	false	false
patient526	false	false	false	false
patient527	false	false	false	false
patient528	false	false	false	false
patient529	false	false	true	false
patient530	false	false	false	false
patient531	false	false	false	false
patient532			false	false
patient533	false	false	false	false
patient534	false	false	false	false
patient535		true	false	false
patient536	false	false	false	false
patient537	false	false	false	false
patient538	false	false	true	false
patient539	false	false	false	false
patient540	false	false	false	false
patient541	false	false	false	false
patient542		true	false	false
patient543	false	false	false	false
patient544	false	false	false	false
patient545	false	false	true	false
patient546	false	false	false	false
patient547		true	false	false
patient548	false	false	false	false
patient549	false	false	false	false
patient550	false	false	false	false
patient551	false	false		false
patient552	false	false	false	false
patient553	false	false	false	false
patient554	false	false	false	false
patient555	false	false	false	false
patient556	false	false	false	false
patient557	false	false	true	false
patient558	false	false		false
patient559		true	false	false
patient560	false	false	false	false
patient561		true	true	true
patient562	false	false	false	false
patient563	false	false	false	false
patient564	false	false	false	false
patient565	false	false	false	false
patient566	false	false	false	false
patient567	false	false	true	false
patient568	false	false	false	false
patient569	false	true	false	false
patient570	false	true	true	true
patient571	false	false	false	false
patient572	false	false	false	false
patient573	false	false	false	false
patient574	false	false	false	false
patient575	false	false	false	false
patient576	false	false	false	false
patient577	false	false	false	false
patient578	false	false	false	false
patient579	false	false	true	false
patient580	false	false	false	false
patient581	false	false	false	false
patient582	false	false	true	false
patient583	false	false	false	false
patient584	false	false	false	false
patient585	false	false	false	false
patient586	false	false	true	false
patient587	false	false	false	false
patient588	false	false	false	false
patient589	false	false	false	false
patient590	false	false	false	false
patient591	false	false	false	false
patient592	false	false	false	false
patient593	false	false	false	false
patient594	false	false	false	false
patient595	false	true	false	false
patient596	false	true	true	true
patient597	false	false	false	false
patient598	false	false	false	false
patient599	false	false	false	false
patient600	false	true	false	false
patient601	false	false	false	false
patient602	false	false	false	false
patient603	false	true	false	false
patient604	false	false	false	false
patient605	false	false	true	false
patient606	false	false	false	false
patient607	false	false	false	false
patient608	false	false	false	false
patient609	false	false	false	false
patient610	false	true	false	false
patient611	false	false	false	false
patient612	false	false	false	false
patient613	false	false	true	false
patient614	false	false	true	false
patient615		true	true	true
patient616	false	false	false	false
patient617	false	false	true	false
patient618	false	false	false	false
patient619	false	false	false	false
patient620	false	false	false	false
patient621	false	false	false	false
patient622	false	false	false	false
patient623	false	false	false	false
patient624	false	false	false	false
patient625	false	false	true	false
patient626	false	false	false	false
patient627	false	false	false	false
patient628	false	false	false	false
patient629	false	false	true	false
patient630	false	false	false	false
patient631	false	false	true	false
patient632	false	false	false	false
patient633	false	false	false	false
patient634	false	false	false	false
patient635	false	false	false	false
patient636		true	false	false
patient637	false	false	true	false
patient638	false	false	false	false
patient639	false	false	false	false
patient640		true	false	false
patient641	false	false	false	false
patient642		true	false	false
patient643	false	false	false	false
patient644	false	false	false	false
patient645	false	false	false	false
patient646	false	false	false	false
patient647	false	false	false	false
patient648	false	false	true	false
patient649	false	false	false	false
patient650	false	false	false	false
patient651	false	false	true	false
patient652	false	false	true	false
patient653	false	false	false	false
patient654	false	false	false	false
patient655	false	false	true	false
patient656	false	false	false	false
patient657	false	false	true	false
patient658	false	false	false	false
patient659	false	false	true	false
patient660	false	false	false	false
patient661	true	false	false	false
patient662	false	false	false	false
patient663	false	false	false	false
patient664	false	false	false	false
patient665	false	false	false	false
patient666	false	false	false	false
patient667	false	false	false	false
patient668	false	false	false	false
patient669	false	false	false	false
patient670	false	false	false	false
patient671	false	false	false	false
patient672	false	false	false	false
patient673	false	true	true	true
patient674	false	false	true	false
patient675	false	false	true	false
patient676	false	false	false	false
patient677	false	false	false	false
patient678	false	true	false	false
patient679	false	false	false	false
patient680	false	false	true	false
patient681	false	false	false	false
patient682	false	false	false	false
patient683	false	false	false	false
patient684	false	false	false	false
patient685	false	false	false	false
patient686	false	false	false	false
patient687	false	false	false	false
patient688	false	false	false	false
patient689	false	false	false	false
patient690	false	false	false	false
patient691	false	false	false	false
patient692	false	false	true	false
patient693	false	false	true	false
patient694	true	false	false	false
patient695	true	false	true	true
patient696	false	false	false	false
patient697	false	false	true	false
patient698	true	false	true	true
patient699	false	false	false	false
patient700	false	false	true	false
patient701	false	false	false	false
patient702	false	false	false	false
patient703	false	false	false	false
patient704	false	false	false	false
patient705	false	false	false	false
patient706	false	false	false	false
patient707	false	false	false	false
patient708	false	false	true	false
patient709	false	false	false	false
patient710	false	false	true	false
patient711	false	false	false	false
patient712	false	false	false	false
patient713	false	false	false	false
patient714	true		false	false
patient715	false	false	false	false
patient716	false	false	false	false
patient717	false	false	true	false
patient718	false	false	false	false
patient719	false	false	false	false
patient720	false	false	true	false
patient721		true	true	true
patient722	false	false	false	false
patient723	false	false	true	false
patient724	false	false	false	false
patient725	false	false	false	false
patient726	false	false	false	false
patient727	false	false	true	false
patient728	false	false	false	false
patient729		true	false	false
patient730	false	false	false	false
patient731	false	false	false	false
patient732	false	false	false	false
patient733	false	false	false	false
patient734	false	false	false	false
patient735	false	false	true	false
patient736	false	false	false	false
patient737	false	false	false	false
patient738	false	false	true	false
patient739	false	false	false	false
patient740	false	false	true	false
patient741	false	false	false	false
patient742	false	false	false	false
patient743	false	false	false	false
patient744	false	false	false	false
patient745	false	false	true	false
patient746	false	false	false	false
patient747	false	false	false	false
patient748	false	false	false	false
patient749	false	false	false	false
patient750	false	false	true	false
patient751	false	false	false	false
patient752	false	false	false	false
patient753	false	false	false	false
patient754	false	false	false	false
patient755	true	false	false	false
patient756	false	false	false	false
patient757	false	false	true	false
patient758	false	false	false	false
patient759	false	false	false	false
patient760	false	false	false	false
patient761	false	false	true	false
patient762	false	false	false	false
patient763	false	false	false	false
patient764	false	false	false	false
patient765	false	false	false	false
patient766	false	false	false	false
patient767	false	false	true	false
patient768	false	false	false	false
patient769	false	false	false	false
patient770	false	false	false	false
patient771	false	false	false	false
patient772	false	false	false	false
patient773	false	false	true	false
patient774	false	false	false	false
patient775	false	false	false	false
patient776	false	true	true	true
patient777	false	true	true	true
patient778	false	false	false	false
patient779	false	false	false	false
patient780	false	false	false	false
patient781	false	false	false	false
patient782	false	false	false	false
patient783	false	false	true	false
patient784	false	false	false	false
patient785	false	false	false	false
patient786	false	false	false	false
patient787	false	false	false	false
patient788	false	false	false	false
patient789	false	false	false	false
patient790	false	false	false	false
patient791	false	false	false	false
patient792	false	false	false	false
patient793	false	false	false	false
patient794	false	false	true	false
patient795	false	false	false	false
patient796	false	false	false	false
patient797	false	false	false	false
patient798	false	false	true	false
patient799	false	false	false	false
patient800	false	false	false	false
patient801	false	false	false	false
patient802	false	false	false	false
patient803		true	false	false
patient804		true	true	true
patient805	false	false	false	false
patient806	false	false	false	false
patient807	false	false	false	false
patient808	false	false	true	false
patient809	false	false	false	false
patient810	false	false	false	false
patient811	false	false	false	false
patient812	false	false	false	false
patient813	false	false	false	false
patient814	false	true	false	false
patient815	false	false	false	false
patient816	true	false	false	false
patient817	false	false	false	false
patient818	false	false	false	false
patient819	false	false	false	false
patient820	false	false	false	false
patient821	false	false	false	false
patient822	false	false	false	false
patient823	false	false	false	false
patient824	false	false	false	false
patient825	false	false	false	false
patient826	false	false	false	false
patient827	false	false	true	false
patient828	false	false	false	false
patient829	false	true	false	false
patient830	false	false	false	false
patient831		true	false	false
patient832	false	false	true	false
patient833		true	false	false
patient834	false	false	false	false
patient835		true	false	false
patient836	false	false	true	false
patient837	false	false	false	false
patient838		true	false	false
patient839	false	false	true	false
patient840	false	false	false	false
patient841		true	true	true
patient842	false	false	true	false
patient843		true	false	false
patient844	false	false	true	false
patient845	false	false	false	false
patient846		true	false	false
patient847	false	false	false	false
patient848	false	false	false	false
patient849	false	false	false	false
patient850	false	false	false	false
patient851	false	false	false	false
patient852	false	false	false	false
patient853	false	false	false	false
patient854	false	true	false	false
patient855	false	false	true	false
patient856	false	false	false	false
patient857	false	false	true	false
patient858	false	false	true	false
patient859	false	false	false	false
patient860	false	false	false	false
patient861	false	true	false	false
patient862	false	false	false	false
patient863	false	false	false	false
patient864	false	false	false	false
patient865	false	false	false	false
patient866	false	false	true	false
patient867	false	false	false	false
patient868	false	false	true	false
patient869	false	false	false	false
patient870	false	false	false	false
patient871	false	false	false	false
patient872	false	false	false	false
patient873	false	false	false	false
patient874	false	false	false	false
patient875	false	false	false	false
patient876	false	false	false	false
patient877	false	false	false	false
patient878	false	true	false	false
patient879	false	false	false	false
patient880	false	false	false	false
patient881	false	false	false	false
patient882	false	false	false	false
patient883	false	false	false	false
patient884	false	false	false	false
patient885	false	false	false	false
patient886	false	false	false	false
patient887
patient888		true	false	false
patient889		true	true	true
patient890			true
patient891	false	false	false	false
patient892	false	false	false	false
patient893	false	false	false	false
patient894	false	false	false	false
patient895	false	false	true	false
patient896	false	false	false	false
patient897	false	false	false	false
patient898	false	false	false	false
patient899	false	false	false	false
patient900	false	false	true	false
patient901	false	false	false	false
patient902	false	false	true	false
patient903	false	false	false	false
patient904	false	false	false	false
patient905			true
patient906	false	false	false	false
patient907	false	true	false	false
patient908	false	false	true	false
patient909	false	false	false	false
patient910	false	false	false	false
patient911	false	false	false	false
patient912	false	false	false	false
patient913	false	true	false	false
patient914	false	false	false	false
patient915	false	false	false	false
patient916	false	false	true	false
patient917	false	false	false	false
patient918	false	false	true	false
patient919	false	false	false	false
patient920	false	false	false	false
patient921	false	false	false	false
patient922	false	false	true	false
patient923	false	false	false	false
patient924	false	false	true	false
patient925	false	false	false	false
patient926	false	false	false	false
patient927	false	false	true	false
patient928	false	false	true	false
patient929	false	false	false	false
patient930	false	false	false	false
patient931	false	false	false	false
patient932	false	false	false	false
patient933	false	false	false	false
patient934	false	false	false	false
patient935	false	false	true	false
patient936	false	false		false
patient937	false	false	false	false
patient938	false	false	false	false
patient939	false	false	false	false
patient940	false	false	true	false
patient941	false	false	false	false
patient942	false	false	false	false
patient943	false	false	false	false
patient944	false	false	true	false
patient945	false	false	false	false
patient946	false	false	true	false
patient947	false	false	false	false
patient948	false	false	false	false
patient949	false	false	false	false
patient950	false	false	false	false
patient951	false	false	false	false
patient952	false	false	true	false
patient953	false	false	false	false
patient954	false	false	true	false
patient955	true	false	false	false
patient956	false	false	true	false
patient957	false	false	false	false
patient958	false	false	false	false
patient959
patient960	false	false	false	false
patient961	false	false	false	false
patient962	false	false	false	false
patient963	false	false	false	false
patient964	false	false	false	false
patient965	false	false	false	false
patient966	false	false	false	false
patient967	true	false	false	false
patient968	false	false	true	false
patient969	false	false	true	false
patient970	false	false	false	false
patient971	false	false	false	false
patient972	false	false	true	false
patient973	false	false	false	false
patient974	false	false	false	false
patient975	false	false	false	false
patient976	false	false	false	false
patient977	false	false	false	false
patient978	false	false	false	false
patient979	false	false	true	false
patient980	false	false	false	false
patient981	false	false	true	false
patient982	false	false	false	false
patient983	false	false	true	false
patient984	false	false	false	false
patient985	false	false	true	false
patient986	false	false	false	false
patient987	false	false	false	false
patient988	false	false	false	false
patient989	false	false	false	false
patient990	false	false	false	false
patient991	false	false	false	false
patient992	false	false	false	false
patient993	false	false	false	false
patient994	false	false	false	false
patient995	false	false	false	false
patient996	false	false	true	false
patient997	false	false	false	false
patient998	false	false	false	false
patient999	false	false	false	false
patient1000	false	false	false	false
patient1001	false	false	false	false
patient1002			false	false
patient1003	false	false	false	false
patient1004	false	false	false	false
patient1005	false	false	true	false
patient1006	false	false	false	false
patient1007	false	true	false	false
patient1008	false	true	false	false
patient1009	false	false	false	false
patient1010	false	false	true	false
patient1011	false	false	false	false
patient1012	false	false	true	false
patient1013	false	false	false	false
patient1014	false	false	false	false
patient1015	false	false	false	false
patient1016	false	false	false	false
patient1017	false	true	false	false
patient1018	false	false	false	false
patient1019	false	false	false	false
patient1020	false	true	false	false
patient1021	false	false	false	false
patient1022	false	false	false	false
patient1023	false	false	true	false
patient1024	false	false	true	false
patient1025	false	true	false	false
patient1026	false	false	true	false
patient1027			true
patient1028			false	false
patient1029			false	false
patient1030	false	false	false	false
patient1031	false	false	false	false
patient1032	false	false	false	false
patient1033	false	false	false	false
patient1034	false	false	false	false
patient1035	false	false	true	false
patient1036	false	false	false	false
patient1037	false	true	true	true
patient1038	false	false	false	false
patient1039	false	true	false	false
patient1040	false	false	false	false
patient1041	false	false	false	false
patient1042	false	false	false	false
patient1043	false	false	false	false
patient1044	false	false	false	false
patient1045	false	false	false	false
patient1046	false	false	false	false
patient1047	false	false	false	false
patient1048	false	false	true	false
patient1049	false	false	false	false
patient1050	false	false	false	false
patient1051	false	true	false	false
patient1052	false	false	false	false
patient1053	false	false	false	false
patient1054	false	false	false	false
patient1055	false	false	true	false
patient1056	false	false	true	false
patient1057	false	false	false	false
patient1058	false	false	false	false
patient1059	false	false	false	false
patient1060	false	false	false	false
patient1061	false	false	false	false
patient1062	false	false	true	false
patient1063	false	false	false	false
patient1064	false	false	false	false
patient1065	false	false	true	false
patient1066	false	false	false	false
patient1067	false	false	false	false
patient1068	false	false	false	false
patient1069	true		true	true
patient1070		true	false	false
patient1071		true	true	true
patient1072		true	false	false
patient1073	false	false	false	false
patient1074		true	false	false
patient1075	false	false	false	false
patient1076	false	false		false
patient1077	false	false	false	false
patient1078	false	false	false	false
patient1079	false	false	false	false
patient1080	false	false	false	false
patient1081	false	false	false	false
patient1082	false	false	false	false
patient1083	false	false	false	false
patient1084	false	false	false	false
patient1085	false	false	false	false
patient1086	false	false	false	false
patient1087	false	false	false	false
patient1088	false	false	false	false
patient1089	false	false	false	false
patient1090	false	false	true	false
patient1091	false	false	true	false
patient1092	false	false	false	false
patient1093		true	true	true
patient1094	false	false	false	false
patient1095		true	false	false
patient1096	false	false	false	false
patient1097	false	false	false	false
patient1098	false	false	false	false
patient1099	false	false	false	false
patient1100	false	false	false	false
patient1101	false	false	false	false
patient1102	false	false	false	false
patient1103	false	false	false	false
patient1104	false	false	false	false
patient1105	false	false	false	false
patient1106	false	false	false	false
patient1107	false	false	false	false
patient1108	false	false	false	false
patient1109	false	false	false	false
patient1110	false	false	false	false
patient1111	false	false	false	false
patient1112		true	true	true
patient1113	false	false	true	false
patient1114	true		false	false
patient1115	false	false	false	false
patient1116	true		false	false
patient1117	false	false	false	false
patient1118	false	false	true	false
patient1119	false	false	true	false
patient1120	false	false		false
patient1121	false	false	false	false
patient1122	false	false	true	false
patient1123	false	false	false	false
patient1124			true
patient1125	false	false	false	false
patient1126	false	false	false	false
patient1127	false	false	false	false
patient1128	false	false	false	false
patient1129	false	false	true	false
patient1130	false	false	false	false
patient1131	false	false	false	false
patient1132	false	false	false	false
patient1133	false	false	true	false
patient1134	false	false	false	false
patient1135	false	false	false	false
patient1136	false	false	false	false
patient1137	false	false	false	false
patient1138	false	false	false	false
patient1139	false	false	false	false
patient1140	false	false	false	false
patient1141		true	false	false
patient1142	false	false	false	false
patient1143	false	false	false	false
patient1144	false	false	true	false
patient1145	false	false	false	false
patient1146	false	false	false	false
patient1147	false	false	false	false
patient1148	true	false	false	false
patient1149	false	false	false	false
patient1150	false	false	false	false
patient1151	false	false	true	false
patient1152	false	false	false	false
patient1153	false	false	false	false
patient1154	false	false	false	false
patient1155	true	false	false	false
patient1156	false	false	false	false
patient1157	false	false	false	false
patient1158	false	false	false	false
patient1159	false	false	false	false
patient1160	false	false	true	false
patient1161	false	false	false	false
patient1162	false	false	false	false
patient1163	false	false	false	false
patient1164	false	false	true	false
patient1165	false	false	true	false
patient1166	false	false	false	false
patient1167	false	false	true	false
patient1168	false	false	false	false
patient1169	false	false	false	false
patient1170	false	false	false	false
patient1171	false	false	false	false
patient1172	false	false	false	false
patient1173	false	false	false	false
patient1174	true	false	false	false
patient1175	true		false	false
patient1176	false	false	false	false
patient1177	false	false	false	false
patient1178	false	false	false	false
patient1179	false	false	true	false
patient1180
patient1181	false	false	false	false
patient1182	false	true	true	true
patient1183	false	false	false	false
patient1184	false	false	false	false
patient1185	false	false	true	false
patient1186	false	false	true	false
patient1187	false	false	false	false
patient1188	false	false	false	false
patient1189	false	false	false	false
patient1190	false	false	false	false
patient1191	false	true	false	false
patient1192	false	false	false	false
patient1193		true	true	true
patient1194	false	false	false	false
patient1195	false	false	false	false
patient1196	false	false	false	false
patient1197	false	false	false	false
patient1198	false	false	false	false
patient1199	false	false	false	false
patient1200	false	false	true	false
patient1201	false	false	false	false
patient1202	false	false	false	false
patient1203	false	false	false	false
patient1204	false	false	false	false
patient1205	false	false	true	false
patient1206	false	false	false	false
patient1207	false	false	false	false
patient1208	false	false	false	false
patient1209	false	false	false	false
patient1210			false	false
patient1211	false	false	false	false
patient1212	false	false	false	false
patient1213	false	false	false	false
patient1214	false	false	false	false
patient1215	false	false	false	false
patient1216	false	false	false	false
patient1217	false	false	false	false
patient1218	false	false	false	false
patient1219	false	false	false	false
patient1220	false	false	false	false
patient1221	false	false	false	false
patient1222	false	false	false	false
patient1223	false	false	false	false
patient1224	false	false	false	false
patient1225	false	false	false	false
patient1226	false	false	false	false
patient1227	false	false	false	false
patient1228	false	false	false	false
patient1229	false	false	false	false
patient1230	false	false	true	false
patient1231	false	false	false	false
patient1232	false	false	true	false
patient1233	false	false	false	false
patient1234	false	false	false	false
patient1235	false	false	false	false
patient1236	false	false	false	false
patient1237	false	false	false	false
patient1238	false	false	false	false
patient1239	false	false	false	false
patient1240	false	false	true	false
patient1241	false	false	false	false
patient1242	false	false	true	false
patient1243	false	false	true	false
patient1244	false	false	false	false
patient1245	false	false	false	false
patient1246	false	false	true	false
patient1247	false	false	false	false
patient1248	false	false	false	false
patient1249	false	false	true	false
patient1250	false	false	false	false
patient1251	false	true	false	false
patient1252	false	true	true	true
patient1253	false	false	false	false
patient1254	false	false	true	false
patient1255	false	false	false	false
patient1256	false	false	false	false
patient1257	false	false	false	false
patient1258	false	false	false	false
patient1259	false	false	false	false
patient1260	false	false	false	false
patient1261	false	false	false	false
patient1262		true	false	false
patient1263	false	false	false	false
patient1264	false	false	true	false
patient1265	false	false	true	false
patient1266		true	true	true
patient1267	false	false	true	false
patient1268	false	false	false	false
patient1269	false	false	true	false
patient1270	false	false	false	false
patient1271	false	false	false	false
patient1272	false	false	false	false
patient1273	false	false	false	false
patient1274	false	false	true	false
patient1275	false	false	false	false
patient1276	false	false	false	false
patient1277	false	false	false	false
patient1278	false	false	true	false
patient1279	false	false	false	false
patient1280	false	false	true	false
patient1281	false	false	false	false
patient1282	false	false	false	false
patient1283	false	false	false	false
patient1284	false	false	false	false
patient1285	false	false	false	false
patient1286	false	false	false	false
patient1287	false	false	true	false
patient1288	false	false	true	false
patient1289	false	false	false	false
patient1290	false	false	false	false
patient1291	false	false	true	false
patient1292	false	false	false	false
patient1293	false	false	false	false
patient1294	false	false	true	false
patient1295	false	false	false	false
patient1296	false	false	false	false
patient1297	false	false	false	false
patient1298	false	false	true	false
patient1299			true
patient1300	false	false	true	false
patient1301	false	true	false	false
patient1302	false	false	false	false
patient1303	false	false	false	false
patient1304	false	false	false	false
patient1305	false	false	false	false
patient1306	false	false	true	false
patient1307	false	true	true	true
patient1308	false	false	false	false
patient1309	false	false	false	false
patient1310	false	true	false	false
patient1311	false	false	false	false
patient1312	true	true	true	true
patient1313	false	false	false	false
patient1314			false	false
patient1315	false	false	false	false
patient1316	false	false	false	false
patient1317	false	false	true	false
patient1318	false	false	false	false
patient1319	false	false	true	false
patient1320	false	false	false	false
patient1321	false	false	false	false
patient1322	false	false	false	false
patient1323	false	false	false	false
patient1324	false	false	false	false
patient1325	false	false	false	false
patient1326	false	false	false	false
patient1327	false	false	false	false
patient1328	false	false	true	false
patient1329	false	false	false	false
patient1330	false	false	false	false
patient1331	false	false	true	false
patient1332	false	false	false	false
patient1333	false	false	false	false
patient1334	false	false	false	false
patient1335	false	false	false	false
patient1336	false	true	false	false
patient1337	false	false	true	false
patient1338	false	false	false	false
patient1339	false	true	false	false
patient1340	false	false	true	false
patient1341	false	false	true	false
patient1342	false	false	true	false
patient1343	false	false	true	false
patient1344	false	false	false	false
patient1345	false	false	false	false
patient1346	false	false	true	false
patient1347	false	true	true	true
patient1348			true
patient1349	false	false	false	false
patient1350			false	false
patient1351	false	false	false	false
patient1352	true	false	false	false
patient1353	false	false	false	false
patient1354	false	false	false	false
patient1355	false	false	false	false
patient1356	false		true
patient1357	false	false	false	false
patient1358	false	false	false	false
patient1359	false	false	false	false
patient1360	false	false	false	false
patient1361	false	false	false	false
patient1362	false	false	true	false
patient1363	false	false	false	false
patient1364	false	false	false	false
patient1365	false	false	false	false
patient1366	false	true	false	false
patient1367	false	false	false	false
patient1368	false	false	false	false
patient1369	false	false	true	false
patient1370	false	true	false	false
patient1371	false	false	true	false
patient1372	false	false	true	false
patient1373	false	false	false	false
patient1374	false	false	false	false
patient1375	false	false	false	false
patient1376	false	true	false	false
patient1377	false	false	false	false
patient1378	false	false	false	false
patient1379	false	false	false	false
patient1380	false	false	true	false
patient1381	false	false	false	false
patient1382	false	false	false	false
patient1383	false	false	false	false
patient1384	false	true	true	true
patient1385	false	false	false	false
patient1386	false	false	false	false
patient1387	false	false	false	false
patient1388	false	false	false	false
patient1389	false	false	true	false
patient1390	false	false	false	false
patient1391	false	false	false	false
patient1392	false	false	true	false
patient1393	false	false	false	false
patient1394	false	false	false	false
patient1395	false	true	true	true
patient1396	false	true	false	false
patient1397	false	false	true	false
patient1398	false	false	true	false
patient1399	false	false	false	false
patient1400	false	false	false	false
patient1401	false	false	true	false
patient1402	false	false	false	false
patient1403	false	false	true	false
patient1404	false	false	false	false
patient1405	false	false	false	false
patient1406	false	false	false	false
patient1407	false	false	false	false
patient1408	false	false	false	false
patient1409	false	false	false	false
patient1410	false	false	true	false
patient1411		true	false	false
patient1412	false	false	false	false
patient1413	false	false	false	false
patient1414	true		false	false
patient1415	false	false	false	false
patient1416	false	false	false	false
patient1417	false	false	false	false
patient1418		true	true	true
patient1419	false	false	false	false
patient1420		true	true	true
patient1421		true	false	false
patient1422		true	false	false
patient1423	false	false	false	false
patient1424	false	false	false	false
patient1425	false	true	false	false
patient1426	false	false	true	false
patient1427	false	false	false	false
patient1428	false	true	false	false
patient1429	false	false	false	false
patient1430	false	true	false	false
patient1431	false	false	false	false
patient1432	false	false	false	false
patient1433	false	false	false	false
patient1434	false	false	false	false
patient1435		true	true	true
patient1436		true	false	false
patient1437	false	false	false	false
patient1438	false	false	false	false
patient1439	false	false	false	false
patient1440	false	false	true	false
patient1441	false	false	false	false
patient1442	false	false	true	false
patient1443	false	false	true	false
patient1444	false	false	false	false
patient1445	true		true	true
patient1446		true	false	false
patient1447		true	false	false
patient1448	false	false	false	false
patient1449	false	false	false	false
patient1450		true	false	false
patient1451	false	false	true	false
patient1452		true	false	false
patient1453	false	false	true	false
patient1454	false	false	false	false
patient1455	false	false	true	false
patient1456	false	false	false	false
patient1457	false	false	false	false
patient1458	false	false	true	false
patient1459	false	false	true	false
patient1460	false	false	true	false
patient1461	false	false	false	false
patient1462	false	false	false	false
patient1463	false	false	true	false
patient1464	false	false	false	false
patient1465	false	false	false	false
patient1466	false	false	true	false
patient1467	false	false	false	false
patient1468	false	false	false	false
patient1469	false	false	false	false
patient1470	false	false	false	false
patient1471	false	false	false	false
patient1472	false	false	false	false
patient1473	false	false	false	false
patient1474	true	false	false	false
patient1475	false	false	true	false
patient1476	false	false	false	false
patient1477	false	false	false	false
patient1478	false	false	false	false
patient1479	false	false	true	false
patient1480	false	false	false	false
patient1481	false	false	false	false
patient1482	false	false	false	false
patient1483	false	false	false	false
patient1484	false	false	false	false
patient1485	false	false	false	false
patient1486	false	false	false	false
patient1487	false	false	false	false
patient1488	false	false	false	false
patient1489	false	false	false	false
patient1490	false	false	true	false
patient1491	false	false	true	false
patient1492	false	false	false	false
patient1493	false	false	false	false
patient1494	false	false	false	false
patient1495	true	false	true	true
patient1496	false	false	true	false
patient1497	true	false	false	false
patient1498	false	false	false	false
patient1499	false	false	false	false
patient1500	true	false	true	true
patient1501	false	false	true	false
patient1502	false	false	false	false
patient1503	false	false	false	false
patient1504	false	false	true	false
patient1505	false	false	true	false
patient1506	false	false	false	false
patient1507	false	false	false	false
patient1508	false	false	false	false
patient1509	false	false	false	false
patient1510	false	false	true	false
patient1511	false	false	true	false
patient1512	false	false	false	false
patient1513	true	false	false	false
patient1514	false	false	false	false
patient1515	false	false	false	false
patient1516	false	false	false	false
patient1517	false	true	true	true
patient1518	false	false	false	false
patient1519	false	false	false	false
patient1520	false	false	false	false
patient1521	false	false	false	false
patient1522	false	false	false	false
patient1523	false	false	true	false
patient1524	false	false	false	false
patient1525	false	false	false	false
patient1526	false	false	false	false
patient1527	false	false	true	false
patient1528	false	false	true	false
patient1529	false	false	false	false
patient1530	false	false	false	false
patient1531	false	false	false	false
patient1532	false	false	false	false
patient1533	false	false	true	false
patient1534	false	false	true	false
patient1535	false	true	true	true
patient1536	false	false	false	false
patient1537	false	false	false	false
patient1538	false	false	true	false
patient1539	false	false	true	false
patient1540	false	false	false	false
patient1541	false	false	true	false
patient1542	false	false	false	false
patient1543	false	false	true	false
patient1544	false	false	false	false
patient1545	false	false	false	false
patient1546	false	false	false	false
patient1547			false	false
patient1548	false	false	true	false
patient1549	false	false	false	false
patient1550	false	false	false	false
patient1551	false	false	false	false
patient1552			false	false
patient1553	false	false	false	false
patient1554	false	false	true	false
patient1555	false	false	false	false
patient1556	false	false	true	false
patient1557	false	false	false	false
patient1558	false	false	false	false
patient1559	false	false	true	false
patient1560	true	false	true	true
patient1561	false	false	false	false
patient1562	false	false	true	false
patient1563	false	false	false	false
patient1564	false	false	false	false
patient1565	false	false	false	false
patient1566	false	false	false	false
patient1567	false	false	false	false
patient1568	false	false	false	false
patient1569	false	false	false	false
patient1570		true	true	true
patient1571	false	false	false	false
patient1572	false	false	true	false
patient1573	false	false	true	false
patient1574	false	false	false	false
patient1575	false	false	false	false
patient1576	false	false	false	false
patient1577	false	false	false	false
patient1578	false	false	false	false
patient1579	false	false	false	false
patient1580	true		false	false
patient1581	false	false	true	false
patient1582	false	false	true	false
patient1583	false	false	false	false
patient1584	false	false	false	false
patient1585	false	false	true	false
patient1586	false	false	false	false
patient1587	true		false	false
patient1588	false	false	false	false
patient1589	false	false	true	false
patient1590	false	false	true	false
patient1591	false	false	false	false
patient1592	false	false	false	false
patient1593	false	false	false	false
patient1594	false	false	false	false
patient1595	false	false	false	false
patient1596	false	false	false	false
patient1597	false	false	false	false
patient1598	false	false	false	false
patient1599	false	false	true	false
patient1600	false	true	false	false
patient1601	false	false	false	false
patient1602	false	true	false	false
patient1603	false	false	false	false
patient1604	false	false	false	false
patient1605	false	false	false	false
patient1606	false	false	false	false
patient1607	false	false	false	false
patient1608	false	false	false	false
patient1609		true	false	false
patient1610	false	false	false	false
patient1611	false	false	true	false
patient1612	false	false	true	false
patient1613	false	false	false	false
patient1614	false	false	false	false
patient1615	false	false	false	false
patient1616	false	false	false	false
patient1617	false	false	false	false
patient1618		true	false	false
patient1619	false	false	false	false
patient1620	false	false	false	false
patient1621	false	false	true	false
patient1622	false	false	false	false
patient1623	false	false	false	false
patient1624	false	false	true	false
patient1625	false	false	true	false
patient1626	false	false	false	false
patient1627	false	false	false	false
patient1628	false	false	true	false
patient1629	false	false	false	false
patient1630	false	false	true	false
patient1631		true	false	false
patient1632		true	false	false
patient1633		true	true	true
patient1634	false	false	false	false
patient1635	false	false	true	false
patient1636		true	false	false
patient1637	false	false	false	false
patient1638	false	false	false	false
patient1639	false	false	false	false
patient1640	false	false	false	false
patient1641	false	false	false	false
patient1642	false	false	true	false
patient1643	false	false	false	false
patient1644	false	false	false	false
patient1645	false	false	false	false
patient1646	false	false	false	false
patient1647	false	false	false	false
patient1648	false	false	false	false
patient1649	false	false	false	false
patient1650	false	false	false	false
patient1651	false	false	true	false
patient1652	false	false	false	false
patient1653	false	false	false	false
patient1654	false	false	false	false
patient1655	false	false	true	false
patient1656	false	false	false	false
patient1657	false	false	false	false
patient1658	false	false	true	false
patient1659	false	false	false	false
patient1660	false	false	false	false
patient1661	false	false	true	false
patient1662	false	false	false	false
patient1663	false	false	false	false
patient1664	false	false	false	false
patient1665	true	false	false	false
patient1666	false	false	false	false
patient1667	false	false	true	false
patient1668	false	false	true	false
patient1669	false	false	false	false
patient1670	false	false	true	false
patient1671	false	true	false	false
patient1672	false	false	false	false
patient1673	false	true	false	false
patient1674	false	false	false	false
patient1675	false	false	false	false
patient1676	false	false	false	false
patient1677	false	false	false	false
patient1678	false	false	false	false
patient1679	false	false	true	false
patient1680	false	false	true	false
patient1681	false	false	false	false
patient1682	false	false	false	false
patient1683	false	false	true	false
patient1684	false	false	false	false
patient1685	false	true	false	false
patient1686	false	false	false	false
patient1687	false	true	false	false
patient1688	false	false	false	false
patient1689	false	false	false	false
patient1690	false	false	true	false
patient1691	false	false	false	false
patient1692	false	false	false	false
patient1693	false	false	false	false
patient1694	false	false	false	false
patient1695	false	false	true	false
patient1696	false	false	false	false
patient1697	false	false	false	false
patient1698	false	false	false	false
patient1699	false	false	true	false
patient1700	false	false	false	false
patient1701	false	false	false	false
patient1702	false	false	false	false
patient1703	false	false	true	false
patient1704	false	false	true	false
patient1705	false	true	false	false
patient1706	false	false	false	false
patient1707	false	false	false	false
patient1708	true	true	false	false
patient1709	false	false	false	false
patient1710	false	false	false	false
patient1711	false	true	true	true
patient1712	false	false	true	false
patient1713	false	true	false	false
patient1714	false	true	true	true
patient1715	false	false	true	false
patient1716	false	false	false	false
patient1717	false	false	true	false
patient1718	false	false	false	false
patient1719	false	false	false	false
patient1720
patient1721	false	false	true	false
patient1722	false	false	false	false
patient1723	false	false	false	false
patient1724	false	false	false	false
patient1725	false	false	true	false
patient1726	false	false	true	false
patient1727	false	true	true	true
patient1728	false	false	true	false
patient1729	false	false	false	false
patient1730	false	false	false	false
patient1731	false	false	false	false
patient1732	false	false	false	false
patient1733	false	false	false	false
patient1734	false	false	false	false
patient1735	false	true	false	false
patient1736	false	false	true	false
patient1737	false	false	false	false
patient1738	false	false	false	false
patient1739	false	false	false	false
patient1740	false	false	true	false
patient1741	false	false	false	false
patient1742	false	false	true	false
patient1743	false	true	false	false
patient1744	false	false	false	false
patient1745	false	false	false	false
patient1746	false	false	false	false
patient1747	false	false	false	false
patient1748	false	true	false	false
patient1749	false	false	false	false
patient1750	false	false	true	false
patient1751	false	false	false	false
patient1752	false	false	true	false
patient1753		true	true	true
patient1754	false	false		false
patient1755	false	false	false	false
patient1756		true	false	false
patient1757	false	false	false	false
patient1758	false	false	false	false
patient1759	false	false	true	false
patient1760	false	false	false	false
patient1761	false	true	false	false
patient1762	false	false	true	false
patient1763	false	false	false	false
patient1764	false	false	true	false
patient1765	false	false	false	false
patient1766	false	false	false	false
patient1767	false	false	false	false
patient1768	false	false	false	false
patient1769	false	false	false	false
patient1770	false	false	false	false
patient1771	false	true	false	false
patient1772	false	false	true	false
patient1773	false	false	false	false
patient1774	false	false	true	false
patient1775	false	true	false	false
patient1776	false	false	false	false
patient1777	false	false	false	false
patient1778	false	false	false	false
patient1779	false	false	true	false
patient1780	false	true	false	false
patient1781	false	false	false	false
patient1782	false	false	true	false
patient1783	false	true	false	false
patient1784	false	false	false	false
patient1785	false	false	false	false
patient1786	false	false	true	false
patient1787	false	true	false	false
patient1788	false	true	false	false
patient1789	false	false	false	false
patient1790	false	false	false	false
patient1791	false	false	true	false
patient1792	false	false	false	false
patient1793	false	false	false	false
patient1794	false	false	true	false
patient1795	false	true	true	true
patient1796	false	false	true	false
patient1797	false	false	false	false
patient1798	false	false	false	false
patient1799	false	false	false	false
patient1800	false	false	false	false
patient1801	false	false	true	false
patient1802	false	false	false	false
patient1803	false	false	true	false
patient1804	false	false	true	false
patient1805	false	true	false	false
patient1806	false	false	false	false
patient1807	false	false	false	false
patient1808	false	false	false	false
patient1809	false	false	false	false
patient1810	false	false	false	false
patient1811	false	false	true	false
patient1812	false	false	true	false
patient1813	false	true	true	true
patient1814	false	false	false	false
patient1815	false	false	false	false
patient1816	false	true	true	true
patient1817	false	false	false	false
patient1818	false	false	false	false
patient1819	false	false	true	false
patient1820	false	true	false	false
patient1821	false	true	true	true
patient1822	false	false	false	false
patient1823	false	true	false	false
patient1824	false	false	false	false
patient1825	false	false	false	false
patient1826	false	true	true	true
patient1827	false	false	false	false
patient1828	false	true	false	false
patient1829	false	true	false	false
patient1830	false	true	false	false
patient1831	false	false	true	false
patient1832	false	false	false	false
patient1833	false	false	false	false
patient1834	false	false	true	false
patient1835	false	false	false	false
patient1836	false	false	false	false
patient1837	false	false	false	false
patient1838	false	false	true	false
patient1839	false	false	false	false
patient1840	false	false	false	false
patient1841	false	false	true	false
patient1842	false	false	false	false
patient1843	false	false	true	false
patient1844	false	false	false	false
patient1845	false		true
patient1846	false	false	true	false
patient1847	false	false	true	false
patient1848	false	false	false	false
patient1849	false	false	true	false
patient1850	false	false	false	false
patient1851	false	false	false	false
patient1852	false	false	false	false
patient1853	false	false	false	false
patient1854	false	false	false	false
patient1855	false	true	true	true
patient1856	false	true	false	false
patient1857	false	true	false	false
patient1858	false	true	true	true
patient1859	false	true	true	true
patient1860	false	false	false	false
patient1861	false	false	true	false
patient1862	false	false	false	false
patient1863	false	true	true	true
patient1864	false	false	false	false
patient1865	false	true	false	false
patient1866	false	false	false	false
patient1867	false	false	false	false
patient1868	false	false	false	false
patient1869	false	false	false	false
patient1870	false	false	true	false
patient1871	false	false	false	false
patient1872	false	true	true	true
patient1873	false	false	false	false
patient1874	false	false	true	false
patient1875	false	false	false	false
patient1876	false	true	false	false
patient1877	false	true	false	false
patient1878	false	false	false	false
patient1879	false	true	false	false
patient1880	false	false	true	false
patient1881	false	false	false	false
patient1882	false	false	false	false
patient1883	false	true	false	false
patient1884	false	false	false	false
patient1885	false	true	false	false
patient1886	false	false	false	false
patient1887	false	false	false	false
patient1888	false	false	false	false
patient1889	false	true	false	false
patient1890	false	false	false	false
patient1891	false	false	false	false
patient1892	false	false	false	false
patient1893	false	false	true	false
patient1894	false	false	true	false
patient1895	false	false	false	false
patient1896	false	false	false	false
patient1897	false	true	false	false
patient1898	false	false	false	false
patient1899	false	false	false	false
patient1900	false	false	false	false
patient1901	false	false	false	false
patient1902	false	false	false	false
patient1903	true	true	false	false
patient1904	false	false	true	false
patient1905	false	true	false	false
patient1906	false	false	false	false
patient1907	false	true	true	true
patient1908	false	false	false	false
patient1909	false	false	true	false
patient1910	false	false	false	false
patient1911	false	false	true	false
patient1912	false	false	false	false
patient1913	false	true	false	false
patient1914	false	false	false	false
patient1915	false	false	false	false
patient1916	false	false	false	false
patient1917	false	false	false	false
patient1918	false	false	true	false
patient1919	false	false	false	false
patient1920	false	false	false	false
patient1921	false	false	false	false
patient1922	false	false	false	false
patient1923	false	false	true	false
patient1924	false	false	false	false
patient1925	false	true	false	false
patient1926	false	false	false	false
patient1927	false	false	false	false
patient1928	false	true	true	true
patient1929	false	false	false	false
patient1930	false	false	false	false
patient1931	false	true	false	false
patient1932	false	true	false	false
patient1933	false	false	false	false
patient1934	false	true	false	false
patient1935	false	false	false	false
patient1936	true		true	true
patient1937	false	false	false	false
patient1938	false	false	false	false
patient1939	true		false	false
patient1940	false	false	false	false
patient1941	false	false	false	false
patient1942	false	false	false	false
patient1943	false	false	true	false
patient1944	false	false	false	false
patient1945	false	false	true	false
patient1946	false	false	true	false
patient1947			true
patient1948	false	false	false	false
patient1949	false	false	true	false
patient1950	false	false	false	false
patient1951	false	false	false	false
patient1952		true	false	false
patient1953		true	true	true
patient1954	false	false	true	false
patient1955	false	false	false	false
patient1956	false	false	true	false
patient1957		true	false	false
patient1958	false	false	true	false
patient1959		true	false	false
patient1960		true	true	true
patient1961	true		false	false
patient1962		true	false	false
patient1963		true	true	true
patient1964		true	false	false
patient1965	false	false	false	false
patient1966	false	false		false
patient1967	false	false	false	false
patient1968	false	false	false	false
patient1969		true	false	false
patient1970		true	true	true
patient1971	false	false		false
patient1972	true
patient1973			false	false
patient1974	false	false	false	false
patient1975	false	false	true	false
patient1976	false	false	true	false
patient1977	false	false	false	false
patient1978	false	false	false	false
patient1979	false	false	false	false
patient1980	false	false	true	false
patient1981	false	false	false	false
patient1982	false	false	false	false
patient1983	false	false	false	false
patient1984	false	false	false	false
patient1985	false	false	true	false
patient1986	false	false	true	false
patient1987		true	false	false
patient1988	false	false	false	false
patient1989	false	false	false	false
patient1990	false	false	false	false
patient1991		true	false	false
patient1992		true	false	false
patient1993	false	false	false	false
patient1994	false	false	false	false
patient1995	false	false	false	false
patient1996	false	false	true	false
patient1997		true	false	false
patient1998	false	false	false	false
patient1999	false	false	false	false
[truncated: 10,047 more rows]
